# Supplementary material
Source: publisher site journal article supplement (https://www.dovepress.com/article/602433)
Supplement: Supplementary file 1 [file 602433%20Supplementary%20Material.docx]

**APPENDIX 1. The COSMIN Study Design checklist**

| **General Reporting recommendations relevant for all studies on measurement properties** | | | |
| --- | --- | --- | --- |
| **Item Number** | **Item Name** | **Item Description** | **Page(s)** |
| **Report section: Title** | |  |  |
| T1 | Patient Reported Outcome Measure (PROM) | The name of the PROM instrument(s) (and version if relevant) being studied | 1 |
| T2 | Measurement Property (MP) | What MPs are being studied or more generally, that MPs are being studied (if there are many properties being investigated, for example) | 1 |
| T3 | Study sample | General description of relevant study sample characteristics (e.g., condition of interest, language) and also any intervention or exposure (e.g., treatments) if applicable. | 1 |
| **Report section: Abstract** | |  |  |
| A1 | PROM | The name of the PROM instrument(s) (and version if relevant) being studied (i.e. the SF-36 or SF-12; language version) or if it concerns an item bank (e.g., PROMIS instruments). The type of instrument (e.g. a self reported scale or interview). | 1 |
| A2 | Measurement Property | What MPs are being studied or more generally, that MPs are being studied (if there are many properties being investigated, for example) | 1 |
| A3 | Design | The type of study being used to test the properties (e.g., test- retest design, longitudinal study, cohort, cross sectional, case series, randomized etc.). Other details of the study design if relevant (intervention/exposure, description of comparison instruments, outcomes other than PROMs). | 1 |
| A4 | Sample | Inclusion / exclusion criteria. General description of relevant study sample characteristics (e.g., condition of interest, geographic location, language, other relevant demographic and baseline characteristics) | 1 |
| A5 | Methods | A brief description of the methods for investigating each MP including statistical analyses | 1 |
| A6 | Results | The main results for all MPs investigated reporting statistics for each result with measures of precision where appropriate. | 1 |
| A7 | Discussion/Conclusions | A brief description of the results in the context of existing evidence, main strengths and drawbacks and the need for future research on the PROM(s) investigated. | 1 |
| **Report section: Introduction** | |  |  |
| I1 | Name and describe the PROM of interest | Specify the name, type, language, and version of the PROM being investigated and how it was developed. Describe the construct the PROM aims to measure and its subscales; describe the structure of the PROM (e.g., the number of factors, the number of items, scoring algorithm); describe relevant instructions (like time period), and number or type of response categories. State whether the PROM is based on a reflective or formative model. Note: This information may also appear in the methods section in greater detail. | NA |
| I2 | Target population | Describe the specific target population that the PROM was designed for. The authors need to provide the appropriate and necessary characteristics of this population. | 2 |
| I3 | Citation for the original development of the PROM | The citation for the original development paper(s) should be provided and other highly relevant citations related to the quality of the specific PROM under investigation. | NA |
| I4 | State of Knowledge & Rationale | A description of the current scientific knowledge (what is known) regarding the MPs of? the PROM under investigation. The authors should provide a literature review or refer to a recent review of all existing evidence of the specific version (e.g., language, short form) of the PROM and explain why the new study is necessary and important. The rational for the current proposed study should be given. | 3 |
| I5 | Definitions | Specialized terms should be defined or explained. | NA |
| I6 | Objectives and Hypotheses | State the specific objective(s) of the research and hypotheses related to the specific PROM under investigation. | 3 |
| **Report section: General Methods** | |  |  |
| GM1 | Study Design | State the key elements of the study design | 3 |
| GM2 | Participants | State how the participants were chosen; the inclusion and exclusion criteria. (e.g., if a PROM for a specific condition, then the eligibility and selection criteria should reflect this). | 3 and 7 |
| GM3 | PROM administration | An explicit description of how and when the PROM(s) were administered (e.g., in what setting) including data collection devices/system used (e.g. paper based, electronic administration / ePRO) should be provided. | 7 |
| GM4 | Data collection procedures | Provide information about other data collection, exposure methods (e.g., allocation to interventions) and time points / follow-up points. | NA |
| GM5 | Power/sample size calculation | Provide a power calculation for all MP analyses. Alternatively, if a rule of thumb is used, state it and the source/citation. | 7 |
| GM6 | Statistical analyses | Statistical analyses and tests corresponding to all hypotheses or objectives for all MPs should be reported. Where appropriate, a cut-off for statistical significance should be reported (e.g., p-value less than 0.05). A description of all statistics to be used to estimate the magnitude and direction of effect should also be reported, together with measures of variability or precision. Report statistical package used. | 7-10 |
| GM7 | Missing data | State approaches or plan for dealing with missing data. | 9-10 |
| GM8 | Post hoc analysis | The report should specify analyses that used data after the data collection period concluded (i.e., if the analyses were post hoc; secondary data analyses) and describe the rationale for any post hoc analyses. | NA |
| **Report section: General Results** | |  |  |
| GR1 | Missing data | The amount and reasons for missing data should be explained for all analyses for all PROMs (or other outcome measurement instruments) and relevant groups. | 10 |
| GR2 | Participant/patient Characteristics | The study patients’ characteristics should be described, including baseline PROM scores. | 10 |
| GR3 | Sample size | If one study contained analyses using different sample sizes, the authors should report the sample size for each analysis. | 10 |
| **Report section: Discussion** | |  |  |
| D1 | MP evidence | Per measurement property the authors should compare the result to the criteria for good measurement properties (e.g., COSMIN criteria)[27], and determine if the specific MP is sufficient or not. Note: This information may also appear in the results section in greater detail in a table for example. | 11-13 |
| D2 | Practical relevance | The authors need to discuss the practical relevance of the findings. | 13-16 |
| D3 | Strengths and limitations | Strengths and limitations of the study should be discussed. For example, discuss if there were any significant potential biases in the study that could have impacted the results. | 16-17 |
| D4 | Generalizability | Generalizability issues related to the PROM results should be discussed. For example, discuss if the results could be generalized to other populations given the sample studied. | 16 |
| D5 | Instrument changes | Discuss the need for modifications to the existing PROM or new PROM development. If you conclude that one of the measurement properties is insufficient, you could suggest some modification, or if it is really poor, you could suggest stopping use of the PROM (in the specific population or in general). | NA |
| D6 | Future Research | Report specifically the type of research needed to answer new questions arising out of these findings for the particular MP and PROM investigated. | 16 |
| **Report section: Conclusions** | |  |  |
| C1 | Conclusions | State the overall conclusions for each MP and of the use PROM investigated. | 18 |
| **Report section: Other information** | |  |  |
| O1 | Conflict of Interest | State any relevant conflict of interest related to the PROM under investigation (e.g., an author being the PROM developer, funding body etc). | 18 |

**Appendix 2. Semi Structured Format for Interviews**

1. **Semi-structured format for interviews (for healthcare professionals)**

| The main points of discussion will be the following. Questions will be used only as a guide but allow participants to express themselves freely. The questions will be open-ended. There are no right or wrong answers, only different points of view.  **Foreword**: The interviewer thanks the participants for their time in advance.  **Brief introduction**: The interviewer will greet and briefly introduce herself to the participants  **Purpose**: Explain the purpose of the research and make sure people can talk freely and privately (ensure privacy and freedom of discussion). Explain how long the interview will take and obtain verbal or written informed consent to participate in this interview/research.  **Example**:  “Thank you for being interested in sharing your experiences in this interview. My name is (name), I am researcher from the Faculty Pharmacy of Padjadjaran University. The interview will be held for 15-30 minutes. There are no correct or incorrect answers, simply different points of view. Your role as a respondent is here to reflect on your experience in providing treatment as a doctor/pharmacist/nurse for chronic disease patients using medication (hypertension and diabetes mellitus).  Currently, the medication adherence rate is still low in chronic disease patients which can lead to increased comorbidities, healthcare costs, and even death. Self-reported scales are the preferred choice and are widely used in clinical practice to assess medication adherence. However, most self-reported scales are developed by developed countries with adequate health care systems. Thus, this self-reported scale if used in developing countries may have several weaknesses, such as inaccuracies in the situation and conditions in the question items as well as the additional cost of obtaining a license.  Therefore, the main purpose of this interview is to identify barriers to medication adherence in patients so that the results of this interview may subsequently be used to build the scale items. Before we administer this scale to patients, we will ask for your comments regarding the item's content validity. We are very interested to hear your opinion as a health worker and learn directly from your experience.  Whatever is discussed in this room will be kept confidential and will not be attributed to you.  We'll record this conversation so we can remember everything you say, but we won't use your names in our report. Instead, you'll be called "anonymous."  You have the right to stop the interview or refuse to answer questions at any time.  Are you willing to be involved in this research?”  **Participant Introduction**  Ask participants about their work, and how long have they have worked at the primary health care center (Puskesmas)  **Preliminary Questions**   1. In your opinion, what does it mean for a patient to be adherent with medication? 2. Do you think it's a big problem for people with chronic diseases like hypertension and diabetes, in Indonesia to take their medications as prescribed? 3. How do you determine whether a patient is adherent to treatment? (Examine whether scales, pill counts, databases, interviews, or other methods should be used)   **Barriers to Medication Adherence**   1. What are the challenges to medication adherence that you observe among patients with chronic diseases?  - **Patient-related factors:** demographic characteristics (age, sex, education status, marriage status, race, financial status), psychology status (stress, fear, motivated), patient knowledge, patient belief, other (travelling, fasting, forgetfulness) - **Medication-related factors**: frequency, duration of medication, polypharmacy, medication time, drug side effect, medication complexity - **Disease-related factors**: duration of disease, disease complexity, comorbidity, blood pressure too high or low, HbA1c too high or low. - **Health provider-related factors**: support from a health professional, patient involvement in decision making, relationship with doctors/pharmacist/nurse - **Healthcare system-related factors:** cost is too expensive, lack of guidelines, continuity of treatment, convenience to the system - **Societal-related factors:** social support, social belief, religion, stigma  1. Why do you think this is a problem that makes it hard to take medicine as prescribed (medication adherence)?    1. Probing: How do you think (factors) might affect medication adherence?    2. Probing: Can you give an example from your practice of a time when a patient didn't take their medicine as prescribed?   **Conclusion**   1. Do you have anything more to say about medication adherence or anything else you'd like to share? 2. Thank you for today, your honest opinion, and the interesting conversation we had about it. We're very grateful for your help with this research. |
| --- |

1. **Semi-structured format for interviews (for patients)**

| The main points of discussion will be the following. Questions will be used as a guide but allow participants to express themselves freely. The questions will be open-ended. There are no right or wrong answers, only different points of view.  **Foreword**: The interviewer thanks the participants for their time in advance.  **Brief introduction**: The interviewer will greet and briefly introduce herself to the participants  **Purpose**: Explain the purpose of the research and make sure people can talk freely and privately (ensure privacy and freedom of discussion). Explain how long the interview will take, and obtain verbal or written informed consent to participate in this interview/research.  **Example**:  “Thank you for being interested in sharing your experiences in this interview. My name is (name), I am researcher from the Faculty Pharmacy of Padjadjaran University. The interview will be held for 15-30 minutes. There are no correct or incorrect answers, simply different points of view. Your role as a respondent is here to reflect on your experience in undergoing treatment as a chronic disease patient (hypertension and diabetes mellitus).  The main purpose of this interview is to identify barriers to medication adherence in patients so that the results of this interview may subsequently be used to build the scale items. We are very interested to hear your opinion as a patient and learn directly from your experience.  Whatever is discussed in this room will be kept confidential and will not be attributed to you.  We'll record this conversation so we can remember everything you say, but we won't use your names in our report. Instead, you'll be called "anonymous."  You have the right to stop the interview or refuse to answer questions at any time.  Are you willing to be involved in this research?”  **Participant Introduction**  Ask participants about their age, type of chronic disease, number of chronic medications, chronic disease duration, and for how long they use medication.  **Preliminary Questions**   1. Conducted using MARS-5 scale questions 🡪 So as to demonstrate that the answer to this obstacle exploration is received from adherence or non-adherence patients 2. In your opinion, what does it mean for a patient to be adherent with treatment?   **Barriers to Medication Adherence**   1. What are the challenges to medication adherence that you encounter yourself?  - **Patient-related factors:** demographic characteristics (age, sex, education status, marriage status, race, financial status), psychology status (stress, fear, motivated), patient knowledge, patient belief, other (travelling, fasting, forgetfulness) - **Medication-related factors**: frequency, duration of medication, polypharmacy, medication time, drug side effect, medication complexity - **Disease-related factors**: duration of disease, disease complexity, comorbidity, blood pressure too high or low, HbA1c too high or low. - **Health provider-related factors**: support from health professional, patient involvement in decision making, relationship with doctors/pharmacist/nurse - **Healthcare system-related factors:** cost is too expensive, lack of guidelines, continuity of treatment, convenience to the system - **Societal-related factors:** social support, social belief, religion, stigma   **Conclusion**   1. Do you have anything more to say about medication adherence or anything else you'd like to share? 2. Thank you for today, your honest opinion, and the interesting conversation we had about it. We're very grateful for your help with this research. |
| --- |

**Appendix 3. Respondents’ Characteristics (N=419)**

| **Characteristic** | **N** | **%** |  |  |  |
| --- | --- | --- | --- | --- | --- |
| **Gender** |  |  |  |  |
| Male | 85 | 20.3 |  |  |  |
| Female | 334 | 79.7 |  |  |  |
| **Age Group** |  |  |  |  |
| <40 years old | 2 | 0.5 |  |  |  |
| 40- 49 years old | 15 | 3.6 |  |  |  |
| 50 – 59 years old | 88 | 21.0 |  |  |  |
| 60 – 69 years old | 162 | 38.7 |  |  |  |
| > 70 years old | 152 | 36.3 |  |  |  |
| **Diseases** |  |  |  |  |
| Hypertension | 324 | 77.3 |  |  |  |
| Diabetes Mellitus | 90 | 21.5 |  |  |  |
| Dyslipidemia | 5 | 1.2 |  |  |  |
| **Multimorbidity** |  |  |  |  |
| No | 243 | 58.0 |  |  |  |
| Yes | 176 | 42.0 |  |  |  |
| **Duration of First Diagnosed Diseases (in year)** |  |  |  |  |
| < 1 | 34 | 8.1 |  |  |  |
| 2 – 4 | 102 | 24.3 |  |  |  |
| 5 – 10 | 217 | 51.8 |  |  |  |
| >10 | 66 | 15.8 |  |  |  |
| **Total Number of Taken Medication** | | |  |  |
| 1 | 127 | 30.3 |  |  |  |
| 2 | 110 | 26.3 |  |  |  |
| 3 – 4 | 131 | 31.3 |  |  |  |
| >5 | 51 | 12.2 |  |  |  |
| **Health Insurances Coverage** | | |
| Yes | 419 | 100 |
| No | 0 | 0 |

**Appendix 4. Comparison of baseline characteristics between participants included in the test–retest analysis and the remaining sample**

| Characteristic | Retest (n=34) | Non-retest (n=385) | p-value |
| --- | --- | --- | --- |
| Female, n(%) | 27 (79.4) | 307 (79.7) | 0.997 |
| Mean age (SD) | 64.2 (7.2) | 65.4 (9.3) | 0.360 |
| Total Number Medication Taken (SD) | 2.06 (1.88) | 2.62 (1.61) | 0.113 |
| Hypertension, n (%) | 26 (76.5) | 298 (77.4) | 0.727 |
| Duration of Diseae (SD) | 7.44 (4.34) | 7.74 (6.55) | 0.723 |

**Appendix 5. Factors of Contributing Non-Adherence in Chronic Diseases Patients Based on In-Depth Interview**

| No | Categories | Quote |
| --- | --- | --- |
|  | Being busy | "Between looking after the grandkids, cooking, and keeping the house, the day is just full. Suddenly it's bedtime, and I was busy and I was supposed to take something after lunch. It's not that I don't want to, I just get caught up." – Patient 11  “Being a patient and also a Posyandu volunteer means I always have something keeping me busy. When there's a schedule or event at the sub-district office.  I have to go back and forth, so when I finally get home, it suddenly hits me that I missed my dose of medicine” – Patient 5  "Patients often tell me they missed their dose. They're juggling work, family, other commitments, and the medication schedule just gets lost in the shuffle" – Doctor 1  "Many of these chronic medications need to be taken at specific times, maybe with food or away from other meds. I know some patients who are busy, they prioritize their tasks and sometimes the pill gets missed." – Pharmacist 4 |
|  | Memory difficulties | "My mind isn't as sharp as it used to be. The doctor tells me the instructions, I nod, but five minutes later, I can't quite remember the details. And remembering to take the pills every day? It's a real challenge." – Patient 1  We often see patients, especially older ones or those with other conditions impacting cognition, who genuinely struggle to remember if or when they took their medication. They're not being difficult; their memory just fails them.” – Nurse 2 |
|  | Travelling | "We advise patients to keep their medication in their carry-on when they travelling, but travel is still a huge barrier. Patients come back and say they ran out because they miscalculated, or they couldn't keep track of the time” – Doctor 2  "Well, sometimes I go out of town to visit my child and see my grandchild. I was in such a hurry while packing though, that I forgot to bring the medicine, and ended up missing a dose during the trip." – Patient 6 |
|  | Lack of knowledge | “A significant barrier is often simply a lack of understanding about the chronic nature of their disease and the preventive role of the medication. They feel fine today, so they don't taking the pill. They think  it's okay to stop once their feel fine for a week” – Doctor 3  "Sometimes, once I start feeling better physically, and my head and neck aren't heavy, I stop taking my medicine." – Patient 8 |
|  | High concern of experience adverse effect | “They experience something unpleasant, assume it's from the pill, and stop taking it without telling us.” – Doctor 1  "Well, after I started taking that medicine, the one for lowering cholesterol, you know? I actually started feeling muscle pain in my hands. But I had never experienced that symptom before; I was perfectly fine. It felt like taking the medicine just added more problems, which made me uncomfortable." – Patient 13  "The doctor warned me it might make my stomach upset, and oh boy, it really did. It was so uncomfortable, I just couldn't take it anymore. Sometimes, I stopped taking it. So, if I don't feel any major complaints, I don't take the medicine." – Patient 2 |
|  | Polypharmacy | "Managing multiple medications is overwhelming for many patients. Every additional medication increases the complexity of the regimen and the potential for side effects or interactions, making it much harder for patients to stay on track with everything that doctor prescribes." – Pharmacist 1  "Look at this pile! There's one for my sugar, one for my pressure, one for cholesterol, one for my heart... It's breakfast, lunch, dinner, and before bed – always taking pills. Yeah, sometimes I don't take it because it feels like too much." – Patient 7 |
|  | The use of traditional medicine | "I take the doctor's medicine, yes, but I also drink my "jamu" (traditional medicine) in the morning. Sometimes I feel like maybe I don't need the doctor's pills on the days I drink the jamu, or I get confused about the timing. So, it's just easier to skip it." – Patient 9  "There was a case of a patient whose blood sugar was well under control. Surprisingly, they didn't come back for months. They finally came back 6 months later with a blood sugar level of 400. It turned out, after I spoke to the patient, they said they had been offered traditional herbal medicine for diabetes, claiming it was safer to take daily. So they stopped their prescribed medication and took the traditional herbal medicine instead." – Doctor 3 |
|  | Provider Service Dissatisfaction | "Building trust and open communication with patients is absolutely critical. If a patient doesn't feel comfortable talking to their doctor or nurse, they're less likely to ask questions about their medication, less likely to admit they're having trouble, and ultimately, less likely to adhere to the plan." – Nurse 3  "With the doctor I had before, I used to feel uncomfortable, he didn't seem very approachable. So if a question was bothering me, I would never dare ask.  I would just nod along in front of him. But once I got home, I was lost about what I was supposed to do. That situation truly impacted me, making me reluctant to take the doctor's prescribed medication. But now the doctor has changed. The new one is friendly and caring, which makes me feel comfortable asking anything and leading me to take my medicine more regularly." – Patient 4 |
|  | Access and comfort of healthcare system | "In fact, my husband also needs routine medication just like I do. The problem is, due to his numerous complications, he can't pick up his medication at the local CHC. He has to go to the Regional General Hospital. Getting the prescription is a whole journey. First, we need to go to the primary clinic for the referral, wait there for hours. Then go to the bigger hospital, wait again just to see the specialist. It's tiring, costs money for transport, and takes up the whole day. Consequently, he ends up not going back when the medicine runs out." – Patient 10  "We see patients who miss follow-up appointments because of the system. They struggle with the referral process, the long queues, or can't afford the repeated transport costs. This directly impacts their adherence because they can't get their next batch of medication or necessary check-ups." – Nurse 2 |
|  | Lack of support | We always encourage family involvement, but it's not always possible. Patients who live alone or whose families are not involved often face greater challenges. There's no one to remind them, no one to help them get prescriptions, and the emotional burden of managing a chronic illness alone can impact their motivation to adhere." – Doctor 2  "My children are busy with their own lives. Nobody asks me if I've taken my pills, or helps me get to the clinic. I'm on my own to remember everything, and sometimes it's just too much effort." – Patient 3 |
|  | Religious belief | "We encounter patients who have very strong faith, which is good, but sometimes they believe that prayer alone is enough, or that taking medication shows a lack of faith. It's a delicate conversation to ensure they understand that medical treatment can work alongside their faith." – Nurse 1  “"I believe that if it is God's will, I will be healed. I pray every day and have faith. Sometimes I think maybe the medication is not as important as my prayers. God is the one who truly heals. But " – Patient 15  “"During the fasting month, it is very difficult to take my pills at the right time. The schedule doesn't fit with the fasting and prayer times. I try my best, but sometimes I just have to skip doses. And I have faith that God will heal me, as long as I follow His commandments, even though I have to miss my treatment." – Patient 17 |
|  | Social rumors | "You'd be surprised how many patients have incorrect information – maybe from their neighbours or family members. They might think the medicine is addictive or harmful for their kidney. Then they just believe them without asking us. Instead of consulting us, they often just stop the medication and return several months later with more severe conditions than before." – Doctor 3  "My neighbour told me taking pills every single day is not good for my kidneys. She said her relative had problems because of it. Now I'm scared... I skip days sometimes because I worry it's damaging me inside." – Patient 12  "It's frustrating. You spend time explaining that the disease itself, like uncontrolled diabetes or hypertension, is what damages the kidneys, and the medication is crucial to *prevent* that damage. But a single social rumor, repeated by someone they trust more than us, can completely undermine adherence. We hear the 'bad for kidneys' line all the time." – Pharmacist 2 |
|  | Financial constraint | “We know BPJS (national health coverage) covers the basic medications for conditions like hypertension and diabetes well. But for patients with multiple comorbidities, especially complex cardiac issues, the necessary optimal drug might not be in the BPJS formulary at their primary care level, or even at the referral hospital. Prescribing what's best versus what's accessible via BPJS is a constant dilemma, and financial constraint remains a huge barrier when patients can't get or afford the non-covered ones.” – Doctor 3  “In fact, the doctor prescribed a medicine that I couldn't afford to get, since it wasn't covered by BPJS. I'm a BPJS PBI member (the category for low-income individuals receiving government assistance), so I can only use the medications that are covered. I just don't have the funds to pay for medicine outside of BPJS coverage.” – Patient 14 |

**Appendix 6. Test Specification: Mapping of Scale Items to Conceptual Domains of Medication Adherence Barrier**

| **Measured Variable** | Medication Adherence Barriers | |
| --- | --- | --- |
| **Conceptual Definition** | Medication adherence is conceptually defined as the extent to which a patient's behaviour in taking medication coincides with agreed recommendations from a healthcare provider. Non-adherence, therefore, is influenced by barriers that impede a patient's ability to consistently take their prescribed medications. Drawing upon the IMB model, the ABC taxonomy of ESPACOMP, and the WHO framework for adherence to long-term therapies, these barriers encompass patient-related, medication-related, socioeconomic-related, and healthcare-related factors that are amenable to intervention. Understanding these multi-faceted barriers is crucial for predicting non-adherence and developing targeted interventions. | |
| **Operational Definition** | Medication adherence levels and barriers in this study were operationally defined as the aggregate of self-reported perceptions, experiences, and behaviors of patients, measured through a specifically developed scale. This involves the active phase of implementation, where the patient consistently and correctly administers prescribed doses. The scale comprises items categorized into four main domains: Patient-Related Factors, Medication-Related Factors, Healthcare-Related Factors, and Socioeconomic-Related Factors. Respondents indicated their agreement or frequency of experiencing these barriers using a 5-point Likert-type scale (0 = Never, 4 = Always). A higher cumulative score across the relevant items is interpreted as a greater perceived barriers, thereby indicating a higher level of medication non-adherence. By simultaneously capturing patients' actual adherence behaviors and the identified barriers, the scale is designed to provide a comprehensive indication of non-adherence risk and the specific reasons behind it,, thereby facilitating the identification of relevant areas for intervention. | |
| **Test Specification** | The newly developed scale was designed to assess medication adherence levels and its associated barriers by capturing indicators across the conceptual domains relevant to chronic disease patients, specifically those with hypertension, diabetes mellitus, and dyslipidemia, within the Indonesian context. The test specification table below detailed the mapping of each item in the scale to its corresponding conceptual domain. This table demonstrated how the items collectively represented the intended content and structure of the medication adherence barriers construct as defined conceptually and operationally for this study. | |
| **Factor** | **Theme** | **Explanation** |
| **Patient-Related Factors:** This domain assesses internal patient characteristics that influence adherence | Being busy | - **Conceptual Definition:** The self-perceived lack of available time or being preoccupied with other activities, leading to the omission or delay of taking prescribed medication. This reflects a prioritization of other daily demands over medication adherence, often due to a packed schedule or competing responsibilities. - **Operational Definition:** Measured by the self-reported frequency or extent to which a patient attributes missing or delaying medication doses to being busy or having time constraints. |
| Forgetfullness | - **Conceptual Definition:** The involuntary inability to recall or remember to perform the act of taking prescribed medication. - **Operational Definition:** Measured by the self-reported frequency of forgetting to take medication. |
| Travelling | - **Conceptual Definition:** The act of being away from one's usual residence or routine due to travel, which disrupts the regular schedule of medication intake, potentially leading to missed doses or non-adherence. This barrier encompasses challenges like changes in time zones, difficulty carrying medications, or forgetting to pack them. - **Operational Definition:** Measured by the self-reported frequency or extent to which a patient attributes missing or altering medication doses due to being away from home or travelling. |
| Lack of knowledge | - **Conceptual Definition:** The patient's insufficient understanding of their disease, the rationale behind their prescribed medication, or the importance of consistent long-term therapy, leading to self-modification of dosage or premature discontinuation of medication when symptoms improve or disappear. This barrier stems from a deficit in information regarding the chronic nature of their condition or the preventative role of their treatment. - **Operational Definition:** Measured by the self-reported behaviour of reducing medication dosage or stopping medication entirely, attributed to a belief that the medication is no longer necessary once symptoms have subsided or health has improved, reflecting inadequate knowledge about their condition and treatment. |
| High concern of experience adverse effect | - **Conceptual Definition:** The patient's significant apprehension or fear of experiencing actual or potential side effects from their prescribed medication, leading them to independently skip doses, reduce the dosage, or discontinue the medication without consulting a healthcare professional. This barrier reflects a perceived negative impact of the medication on their well-being, influencing their willingness to adhere. - **Operational Definition:** Measured by the self-reported behaviour of intentionally missing or altering medication doses due to worries about, or the actual experience of, adverse effects, specifically when this action is taken without prior discussion or approval from a healthcare provider. |
| **Medication-related:** This domain focuses on the characteristics of the medication itself or factors directly linked to its use. | Polypharmacy | - **Conceptual Definition:** The simultaneous use of multiple medications by a patient, often defined as taking five or more different drugs concurrently. This barrier arises when the complexity of managing numerous prescriptions, including potential drug-drug interactions, varying dosing schedules, and the sheer volume of pills, overwhelms the patient and leads to confusion, frustration, or intentional non-adherence. It can also include instances where medications are prescribed by different healthcare providers without a unified overview, increasing the risk of adverse events and difficulty in adherence. - **Operational Definition:** Measured by the self-reported difficulty or confusion experienced by a patient in managing their medication regimen due to the large number of prescribed drugs, leading to missed doses, incorrect timing, or discontinuation of one or more medications. This can also encompass a patient's perception that the number of medications is excessive or unmanageable |
| The use of traditional medicine | - **Conceptual Definition:** The influence of using traditional or alternative medicines that leads to the omission or discontinuation of prescribed medical treatments - **Operational Definition:** Measured by the self-reported influence of traditional medicine use on skipping prescribed medication doses |
| **Healthcare and system-related:** This domain explores the impact of interactions with healthcare providers and the healthcare system on adherence | Provider Service Dissatisfaction | - **Conceptual Definition:** The patient's subjective discontent with the quality or aspects of the services provided by healthcare professionals, leading to irregularities in medication intake - **Operational Definition:** Measured by the self-reported irregularity in medication taking attributed to dissatisfaction with the healthcare provider's service |
| Access and comfort of healthcare sytem | - **Conceptual Definition:** This barrier refers to the difficulties a patient encounters in physically reaching healthcare facilities or navigating the administrative complexities of the healthcare system, leading to challenges in obtaining medication or consistent medical follow-up. This includes issues like geographical distance to clinics or pharmacies, poor transportation infrastructure, or convoluted bureaucratic processes within health insurance systems (e.g., referral hierarchies, long waiting times) that discourage or prevent adherence to prescribed treatments. - **Operational Definition:** Measured by the self-reported frequency or extent to which a patient finds it challenging to access healthcare facilities or manage their medication due to factors such as long travel distances, inadequate public transport, or complicated administrative procedures within their health insurance or referral system (e.g., needing multiple referrals before reaching a specialist or hospital). |
| **Socioeconomic-related:** This domain addresses external social and economic influences on adherence | Lack of support | - **Conceptual Definition:** This barrier refers to the absence or inadequacy of encouragement, assistance, or understanding from a patient's immediate social network, primarily family and close friends, regarding their need for consistent medication adherence. This can manifest as a lack of reminders, practical help (e.g., fetching prescriptions), emotional reinforcement, or even active discouragement or dismissal of the importance of their treatment, ultimately undermining the patient's ability or motivation to take their medication as prescribed. - **Operational Definition:** Measured by the self-reported perception of insufficient help, reminders, or emotional backing from family or close social contacts, leading to instances of missed medication doses or difficulties in maintaining a regular medication schedule. This also includes the patient's feeling that their immediate social environment does not fully understand or support their ongoing treatment needs. |
| Religious belief | - **Conceptual Definition:** This barrier encompasses a patient's conviction that their health outcomes, particularly recovery or mortality, are solely determined by divine will or a higher power, rendering medical interventions secondary or unnecessary. This belief can lead to feelings of hopelessness, fatalism, or a conviction that adherence to prescribed medication is futile, as ultimate healing or death is perceived to be exclusively in the hands of a supreme being. Consequently, patients may intentionally skip doses, discontinue medication, or exhibit a general lack of engagement with their treatment regimen. - **Operational Definition:** Measured by the self-reported frequency or extent to which a patient reduces or stops taking their medication due to a belief that their illness and its outcome are entirely predetermined by religious or spiritual forces, or that only divine intervention, not medication, can bring about healing. This includes expressions of fatalism or a perception that earthly treatments are irrelevant in the face of a higher power's will |
| Social rumors | - **Conceptual Definition:** The impact of anecdotal accounts or shared negative experiences of others (e.g., family, friends, community) on a patient's personal reluctance or hesitancy to adhere to their medication - **Operational Definition:** Measured by the self-reported influence of other people's negative stories regarding medication on one's own willingness to take prescribed medication |
| Financial constraint | - **Conceptual Definition:** This barrier refers to the economic limitations or insufficient financial resources experienced by a patient, which directly impede their ability to consistently afford and acquire prescribed medications, transportation to healthcare facilities, or follow-up appointments. This can lead to rationing medication, skipping doses, or discontinuing treatment altogether due to cost-related concerns, prioritizing other essential expenses over healthcare - **Operational Definition:** Measured by the self-reported frequency or extent to which a patient is unable to purchase their medications, access necessary healthcare services, or maintain their treatment regimen due to lack of money, high medication costs, or other financial burdens. This includes instances where a patient intentionally foregoes or alters their medication schedule to save money |

**Appendix 7. Content Validity Result**

- 1. Results of Content Validity Assessment of I-CVI Phase 1

| **Item** | **Exp1** | **Exp2** | **Exp3** | **Exp4** | **Exp5** | **Exp6** | **Exp7** | **Exp8** | **Exp9** | **Exp10** | **Exp11** | **Exp12** | **I-CVI** | **Action** |
| --- | --- | --- | --- | --- | --- | --- | --- | --- | --- | --- | --- | --- | --- | --- |
| Item 1 | 4 | 4 | 4 | 4 | 4 | 4 | 4 | 4 | 4 | 3 | 4 | 4 | 1 | Retained |
| Item 2 | 4 | 4 | 4 | 4 | 4 | 4 | 4 | 4 | 4 | 4 | 4 | 4 | 1 | Retained |
| Item 3 | 4 | 4 | 4 | 4 | 4 | 4 | 4 | 4 | 4 | 3 | 3 | 4 | 1 | Retained |
| Item 4 | 4 | 4 | 4 | 4 | 4 | 4 | 4 | 4 | 4 | 4 | 4 | 4 | 1 | Retained |
| Item 5 | 4 | 4 | 4 | 4 | 4 | 4 | 4 | 4 | 4 | 3 | 4 | 4 | 1 | Retained |
| Item 6 | 4 | 2 | 4 | 4 | 4 | 4 | 3 | 4 | 4 | 3 | 4 | 4 | 0.917 | Retained |
| Item 7 | 4 | 1 | 2 | 4 | 3 | 4 | 4 | 4 | 3 | 4 | 4 | 4 | 0.833 | Retained |
| Item 8 | 4 | 4 | 4 | 4 | 3 | 4 | 4 | 4 | 1 | 2 | 3 | 1 | 0.667 | Deleted |
| Item 9 | 4 | 4 | 4 | 4 | 3 | 4 | 4 | 4 | 4 | 3 | 4 | 4 | 1 | Retained |
| Item 10 | 4 | 4 | 4 | 4 | 4 | 4 | 4 | 1 | 3 | 2 | 4 | 4 | 0.833 | Retained |
| Item 11 | 4 | 4 | 4 | 4 | 4 | 4 | 4 | 4 | 4 | 3 | 4 | 4 | 1 | Retained |
| Item 12 | 4 | 4 | 4 | 4 | 4 | 4 | 4 | 4 | 4 | 4 | 4 | 4 | 1 | Retained |
| Item 13 | 4 | 4 | 4 | 4 | 4 | 4 | 4 | 4 | 3 | 2 | 4 | 4 | 0.917 | Retained |
| Item 14 | 4 | 1 | 4 | 4 | 4 | 4 | 4 | 4 | 4 | 2 | 4 | 4 | 0.917 | Retained |
| Item 15 | 4 | 2 | 4 | 4 | 4 | 4 | 4 | 4 | 4 | 3 | 3 | 4 | 0.917 | Retained |
| Item 16 | 4 | 1 | 4 | 4 | 4 | 4 | 1 | 4 | 4 | 2 | 3 | 1 | 0.750 | Modified |
| Item 17 | 4 | 4 | 3 | 4 | 3 | 4 | 4 | 4 | 4 | 3 | 4 | 4 | 1 | Retained |
| Item 18 | 4 | 4 | 4 | 4 | 3 | 4 | 4 | 4 | 2 | 3 | 4 | 4 | 0.917 | Retained |
| Item 19 | 4 | 4 | 4 | 4 | 4 | 4 | 4 | 4 | 4 | 2 | 4 | 4 | 0.917 | Retained |
| Item 20 | 4 | 4 | 4 | 4 | 3 | 4 | 4 | 4 | 4 | 2 | 4 | 4 | 0.917 | Retained |
| Item 21 | 4 | 4 | 4 | 4 | 3 | 4 | 4 | 4 | 1 | 3 | 4 | 4 | 1 | Retained |
| Item 22 | 4 | 1 | 2 | 4 | 4 | 4 | 4 | 4 | 4 | 2 | 4 | 4 | 0.750 | Modified |

Note

|  | Deleted |
| --- | --- |
|  | Modified |

- 1. Results of Content Validity Assessment of I-CVI Phase 2

| **Item** | **Expert 1** | | **Expert 2** | | **Expert 3** | | **Expert Agreement** | **I-CVI** | **Action** |
| --- | --- | --- | --- | --- | --- | --- | --- | --- | --- |
| **Score** | **Code** | **Score** | **Code** | **Score** | **Code** |
| Item 1 | 4 | 1 | 4 | 1 | 4 | 1 | 3 | 1,000 | Retained |
| Item 2 | 3 | 1 | 4 | 1 | 2 | 0 | 2 | 0,667 | Deleted |
| Item 3 | 4 | 1 | 4 | 1 | 4 | 1 | 3 | 1,000 | Retained |
| Item 4 | 4 | 1 | 4 | 1 | 4 | 1 | 3 | 1,000 | Retained |
| Item 5 | 4 | 1 | 4 | 1 | 4 | 1 | 3 | 1,000 | Retained |
| Item 6 | 4 | 1 | 4 | 1 | 3 | 1 | 3 | 1,000 | Retained |
| Item 7 | 4 | 1 | 4 | 1 | 4 | 1 | 3 | 1,000 | Retained |
| Item 8 | 4 | 1 | 3 | 1 | 2 | 0 | 2 | 0,667 | Deleted |
| Item 9 | 4 | 1 | 4 | 1 | 4 | 1 | 3 | 1,000 | Retained |
| Item 10 | 4 | 1 | 4 | 1 | 4 | 1 | 3 | 1,000 | Retained |
| Item 11 | 3 | 1 | 4 | 1 | 2 | 0 | 2 | 0,667 | Deleted |
| Item 12 | 4 | 1 | 4 | 1 | 4 | 1 | 3 | 1,000 | Retained |
| Item 13 | 4 | 1 | 4 | 1 | 4 | 1 | 3 | 1,000 | Retained |
| Item 14 | 3 | 1 | 4 | 1 | 1 | 0 | 2 | 0,667 | Deleted |
| Item 15 | 4 | 1 | 4 | 1 | 4 | 1 | 3 | 1,000 | Retained |
| Item 16 | 4 | 1 | 3 | 1 | 2 | 0 | 2 | 0,667 | Deleted |
| Item 17 | 4 | 1 | 3 | 1 | 2 | 0 | 2 | 0,667 | Deleted |
| Item 18 | 3 | 1 | 3 | 1 | 2 | 0 | 2 | 0,667 | Deleted |
| Item 19 | 4 | 1 | 4 | 1 | 4 | 1 | 3 | 1,000 | Retained |
| Item 20 | 4 | 1 | 4 | 1 | 4 | 1 | 3 | 1,000 | Retained |
| Item 21 | 4 | 1 | 4 | 1 | 4 | 1 | 3 | 1,000 | Retained |
| Item 22 | 4 | 1 | 4 | 1 | 4 | 1 | 3 | 1,000 | Retained |
| Item 23 | 4 | 1 | 3 | 1 | 2 | 0 | 2 | 0,667 | Deleted |
| Item 24 | 3 | 1 | 3 | 1 | 2 | 0 | 2 | 0,667 | Deleted |
| Item 25 | 4 | 1 | 4 | 1 | 4 | 1 | 3 | 1,000 | Retained |
| Item 26 | 4 | 1 | 4 | 1 | 4 | 1 | 3 | 1,000 | Retained |
| Item 27 | 4 | 1 | 4 | 1 | 4 | 1 | 3 | 1,000 | Retained |
| Item 28 | 4 | 1 | 3 | 1 | 2 | 0 | 2 | 0,667 | Deleted |
| Item 29 | 4 | 1 | 4 | 1 | 4 | 1 | 3 | 1,000 | Retained |
| Item 30 | 3 | 1 | 3 | 1 | 1 | 0 | 2 | 0,667 | Deleted |
| Item 31 | 4 | 1 | 4 | 1 | 4 | 1 | 3 | 1,000 | Retained |
| Item 32 | 4 | 1 | 4 | 1 | 4 | 1 | 3 | 1,000 | Retained |
| Item 33 | 4 | 1 | 4 | 1 | 4 | 1 | 3 | 1,000 | Retained |
| Item 34 | 3 | 1 | 3 | 1 | 1 | 0 | 2 | 0,667 | Deleted |
| Item 35 | 4 | 1 | 4 | 1 | 4 | 1 | 3 | 1,000 | Retained |
| Item 36 | 4 | 1 | 4 | 1 | 4 | 1 | 3 | 1,000 | Retained |
| Item 37 | 4 | 1 | 4 | 1 | 4 | 1 | 3 | 1,000 | Retained |
| Item 38 | 4 | 1 | 4 | 1 | 4 | 1 | 3 | 1,000 | Retained |
| Item 39 | 4 | 1 | 4 | 1 | 4 | 1 | 3 | 1,000 | Retained |
| Item 40 | 4 | 1 | 4 | 1 | 4 | 1 | 3 | 1,000 | Retained |
| Item 41 | 3 | 1 | 3 | 1 | 2 | 0 | 2 | 0,667 | Deleted |
| Item 42 | 4 | 1 | 4 | 1 | 4 | 1 | 3 | 1,000 | Retained |
| Item 43 | 4 | 1 | 3 | 1 | 1 | 0 | 2 | 0,667 | Deleted |
| Item 44 | 4 | 1 | 4 | 1 | 4 | 1 | 3 | 1,000 | Retained |
| Item 45 | 4 | 1 | 4 | 1 | 4 | 1 | 3 | 1,000 | Retained |
| Item 46 | 3 | 1 | 3 | 1 | 1 | 0 | 2 | 0,667 | Deleted |
| Item 47 | 4 | 1 | 4 | 1 | 4 | 1 | 3 | 1,000 | Retained |
| Item 48 | 4 | 1 | 4 | 1 | 4 | 1 | 3 | 1,000 | Retained |
| Item 49 | 4 | 1 | 4 | 1 | 4 | 1 | 3 | 1,000 | Retained |
| Item 50 | 4 | 1 | 4 | 1 | 4 | 1 | 3 | 1,000 | Retained |

Note

|  | Deleted |
| --- | --- |
|  | Modified |

**Appendix 8. Face Validity**

| No | Item | Quote | Modification |
| --- | --- | --- | --- |
| Patient-Related Factors | | | |
| PX1 | [in] Saya melewatkan minum obat karena aktivitas saya yang terlalu sibuk  [en] I skip my medication because I'm too busy | "Oh yeah, that happens all the time! Sometimes I get so busy that I forget or feel like I don't have time to take my medication. Or sometimes, when I have a pile of work, I deliberately skip it for a bit. So, this question makes total sense and it's something I often experience." [Patient 3] | No modification |
| PX2 | [in] Saya selalu mengutamakan minum obat sesuai dosis sekalipun kegiatan saya padat  [en] I always prioritize taking medication according to the dosage even though I have a busy schedule. | "Yes, this is very clear. It measures medication adherence even with a busy schedule, which is highly relevant. But it feels like the wording could be tightened a bit." [Patient 1] | [in] Saya selalu mengonsumsi obat sesuai dosis, meskipun jadwal padat  [en] I always take my medication as prescribed, even with a busy schedule. |
| PX3 | [in] Saya sering lupa meminum obat saya  [en] I often forget to take my medication | "This question is easy to understand. Anyone can immediately answer whether they often forget or not. It's great” [Patient 8] | No modification |
| PX4 | [in] Saya terlewat minum obat karena lupa menebus obat saya  [en] I missed taking my medicine because I forgot to refill my medicine. | "I understand the point, this is about forgetting to refill medication, especially since with BPJS (Indonesia's national health insurance), we have to stick to a schedule. Perhaps the language could be simplified slightly for a more general audience, but it's already clear." – [Patient 5] | [in] Lupa dalam menebus obat menyebabkan saya melewatkan dosis  [en] Forgetting to refill my medication leads to me missing doses |
| PX5 | [in] Saya melewatkan minum obat karena saya mudah lupa  [en] I missed taking my medication because I forgetful | "This question could potentially put someone with memory issues on the spot. It would be better to focus solely on the act of missing medication, or to phrase it more positively while still addressing the theme of 'forgetting to take medication'." – [Patient 9] | [in] Saya secara rutin mengingat jadwal minum obat agar semua dosis dapat dikonsumsi.  [en] I routinely remember my medication schedule so I can take every dose. |
| PX6 | [in] Saya sering melewatkan minum obat ketika tidak di rumah  [en] I often miss taking my medication when I'm not home | "Very clear. This measures whether travel schedules or conditions affect medication-taking habits. It's a good question." – [Patient 10] | No modification |
| PX7 | [in] Saya melewatkan minum obat karena saya tidak membawa obat-obatan ketika berpergian jauh  [en] I missed my medication doses because I didn't pack my medicine for long trips | "This question is easy to understand and focuses on a common cause, but it could be phrased more concisely." – [Patient 2] | [in] Saya melewatkan minum obat saat berpergian  [en] I skip my medication when I travel |
| PX8 | [in] Saya meminum obat lebih sedikit dari yang diresepkan  [en] I take less medication than prescribed | "This is very straightforward. It's clearly an indicator of non-adherence, reducing the dose without a doctor's recommendation." – [Patient 1] | No Modification |
| PX9 | [in] Saya minum obat hanya ketika merasakan keluhan saja  [en] I only take my medication when I feel symptoms | This question directly addresses a core issue of adherence: taking medication based on symptoms rather than the prescribed schedule. It's very easy to understand." – [Patient 4] | No modification |
| PX10 | [in] Saya berhenti meminum obat ketika saya merasa tubuh saya lebih sehat  [en] I discontinue my medication once I feel healthier | "It's quite clear. But wouldn't 'better' be a more fitting word than 'healthy'? 'Healthy' might imply a full recovery, when it's not necessarily 100% cured." – [Patient 9] | [in] Saya melewatkan meminum obat ketika saya merasa tubuh saya lebih baik  [en] I skip my medication once I feel better |
| PX11 | [in] Saya berhenti minum obat ketika sudah tidak merasakan keluhan  [en] I stop taking my medication when I no longer have symptoms | "This very clearly measures the patient's tendency to discontinue treatment based on symptom resolution, not medical advice. It's highly relevant for chronic disease adherence." – [Patient 10] | No modification |
| PX12 | [in] Saya melewatkan minum obat karena obat tersebut tidak efektif  [en] I skipped my medication because it didn't seem effective. | "Perhaps it would be better to change 'not effective' to 'less potent,' as not everyone might fully understand the meaning of 'effective.'" – [Patient 9] | [in] Saya melewatkan minum obat karena obat tersebut kurang ampuh  [en] I skipped my medication because it didn't seem to work well. |
| PX13 | [in] Saya tidak mengonsumsi obat rutin karena merasa bosan meminumnya  [en] I don't take my regular medication because I get tired of taking it | “I feel it. I really relate with it! This is very straightforward and honest. It's clear and relevant for understanding emotional barriers to adherence." – [patient 6] | No modification |
| PX14 | [in] Saya melewatkan meminum obat karena khawatir efek buruknya bagi tubuh saya  [en] I didn't take my medicine because I was afraid of its negative impact on my body | "The point is clear, but the phrasing could be more concise." – [Patient 3] | [in] Saya melewatkan minum obat karena khawatir efek sampingnya.  [en] I skip my medication because I'm worried about the side effects |
| PX15 | [in] Saya selalu meminum obat sesuai jumlah yang diresepkan sekalipun saya merasa efek samping obat  [en] Despite experiencing side effects, I consistently take my medicine as prescribed | “I understand it clearly. "This is a challenging question. It measures how strongly a patient adheres to the correct dosage despite discomfort. This is an excellent indicator of adherence." | No modification |
| PX16 | [in] Saya tidak minum obat karena merasa kondisi saya lebih buruk setelah meminumnya  [en] I stopped taking my medicine because I felt my condition worsened after taking it | "The meaning is clear. Perhaps it could be revised from 'not taking medication' to “skip” (doses)." – [Patient 5] | [in] Saya sering melewatkan minum obat karena merasa kondisi saya memburuk setelah meminumnya  [en] I frequently skip my medicine because my condition feels worse after I take it |
| PX17 | [in] Saya tetap minum obat secara rutin sekalipun membuat tubuh saya terasa tidak nyaman  [en] Despite experiencing discomfort, I regularly take my medication | "Yeah... good... good... I immediately understand what you mean." – [Patient 10] | No modification |
| Medication-Related Factors | | | |
| MD1 | [in] Saya melewatkan jadwal minum obat karena saya mengonsumsi obat terlalu banyak setiap hari  [en] I skip my medication because I have too many pills to take daily | “It's easily understood and relevant for complex regimens. However, the phrasing could be more concise.” – [Patient 7] | [in] Saya sulit minum obat teratur karena banyak jenis obat yang saya minum  [en] I find it difficult to keep track of all my medications because I take so many different medications |
| MD2 | [in] Saya tetap patuh minum obat setiap hari, sekalipun jumlah obatnya banyak  [en] I consistently take my medication every day, regardless of the large quantity | "This sentence is good, I can understand it easily” – [patient 10] | No modification |
| MD3 | [in] Saya tidak rutin minum obat resep karena telah beralih ke pengobatan alternatif  [en] I don't regularly take my prescription medication because I have switched to alternative treatments. | "Yep, that's right! It's easy to understand” | No modification |
| MD4 | [in] Saya tidak meminum obat sesuai resep karena sudah menggantinya dengan obat tradisional  [en] I've stopped my prescribed medication and am now using traditional medicine instead | "You got it! I totally relate to this situation. It's super relevant in contexts where traditional medicine is widely used. But maybe the sentence could be simplified a bit more to make it even easier to understand." – [Patient 9] | [in] Penggunaan obat tradisional membuat saya tidak rutin meminum obat dari dokter  [en] Taking traditional medicine makes me skip medication |
| Healthcare-Related Factors | | | |
| HP1 | [in] Saya tidak rutin minum obat karena saya tidak puas dengan pelayanan tenaga kesehatan  [en] I don't routinely take my medicine due to dissatisfied with the healthcare provider's service | "Yea I got it. The meaning's clear. Maybe you could simplify the sentence a bit to make it even better." – [Patient 5] | [in] Ketidakpuasan dengan pelayanan tenaga kesehatan membuat saya tidak rutin minum obat  [en] Dissatisfaction with healthcare provider service makes me take my medication irregularly |
| HP2 | [in] Saya rutin minum obat karena tenaga kesehatan memberikan terbaik untuk saya  [en] I regularly take my medication because healthcare professionals give their best for me | "I get it. This is about feeling valued and well-served, which motivates adherence. It's clear and relevant." – Patient 7 | No modification |
| HP3 | [in] Saya melewatkan minum obat karena informasi dari tenaga kesehatan sulit dimengerti  [en] I missed taking my medication because the information from the healthcare provider was difficult to understand. | "Oh, this is much better! It gets straight to the point. Patients are indeed often confused about how to take their medication, especially if the explanation isn't clear. This is highly relevant."– Patient 2 | No modification |
| HP4 | [in] Alur pelayanan kesehatan yang rumit membuat saya enggan berkunjung ke fasilitas kesehatan sehingga membuat saya melewatkan minum obat  [en] The complicated healthcare system makes me reluctant to visit healthcare facilities, which leads me to miss my medication | "Actually, this is a pretty good point about the complicated BPJS process. It's a common problem. But the sentence seems a bit roundabout and confusing; maybe it could be simplified to be easier to understand." – [Patient 9] | [in] Sulit bagi saya untuk konsumsi obat secara teratur karena mengurusnya di fasilitas kesehatan itu ribet  [en] It's hard for me to get my medication regularly because the healthcare system is too complicated to navigate |
| HP5 | [in] Saya tidak meminum obat karena lokasi berobat yang jauh menyulitkan saya  [en] I don't take my medication because the distant location of the clinic/hospital makes it difficult for me | "I agree with this sentence. But perhaps there's a modification needed, maybe the word “menyulitkan” (makes it difficult) could be replaced and directly linked to the issue of medication adherence." – [Patient 2] | [in] Akses yang buruk ke fasilitas kesehatan mempengaruhi kepatuhan saya dalam minum obat  [en] Poor access to healthcare facilities affects my medication adherence. |
| HP6 | [in] Saya melewatkan jadwal minum obat karena persediaan obat di fasyankes habis  [en] I missed my medication dose because the healthcare facility ran out of stock. | "I feel there's nothing wrong with this statement. I could understand it clearly" – [Patient 5] | No modification |
| Socioeconomic-Related Factors | | | |
| SC1 | [in] Saya minum obat rutin karena mendapat dukungan sosial  [en] I take my medication regularly because I get social support | "This sentence directly points to the positive social role in encouraging adherence. Respondents will easily understand what's being asked." – [Patient 7] | No modification |
| SC2 | [in] Kurangnya dukungan keluarga membuat saya sulit rutin minum obat  [en] Lack of family support makes it difficult for me to take medication regularly. | "That's fine, I generally get the meaning of this sentence." – [Patient 3] | No modification |
| SC3 | [in] Saya melewatkan minum obat karena percaya bahwa obat tidak bisa mengubah takdir Tuhan untuk kesehatan saya  [en] I skipped taking my medication because I believe medication cannot alter God's plan for my health | "It's an important question to understand why someone might not be following advice because of their spiritual or religious views." – [Patient 1] | No modification |
| SC4 | [in] Saya melewatkan minum obat karena pada akhirnya takdir Tuhan akan membuat kita meninggal juga  [en] I skipped taking my medication because I believe ultimately, God's will is for us to die anyway | "The phrase “pada akhirnya…meninggal juga” (ultimately... will make us die anyway) feels a bit wordy. I think it would be better to just use 'life and death' as a more common representation of destiny than just 'die anyway.” | [in] Saya tidak rutin minum obat karena meyakini bahwa hidup dan mati hanya ditentukan oleh takdir Tuhan  [en] I don't take my medication regularly because I believe that life and death are only determined by God's destiny |
| SC5 | [in] Saya khawatir akan ketergantungan obat seperti yang dikatakan orang lain, sehingga saya tidak rutin minum obat  [en] Concerns about medication dependency, based on what others told me, led me to not take my medicine consistently | "This point is quite good, but can you make it more concise ” – [Patient 8] | [in] Saya tidak rutin minum obat karena percaya pada pendapat orang lain bahwa obat dapat menyebabkan ketergantungan  [en] I don't take my medicine routinely, as I trust others' views that medication can cause dependency |
| SC6 | [in] Cerita orang-orang mengenai dampak buruk obat membuat saya tidak minum obat  [en] Information from other people about the dangers of medication caused me to stop taking it | “"This sentence seems to describe a barrier I often experience myself, and it's something I frequently hear my friends say too, like, 'Oh, don't take medicine every day; you'll damage your kidneys!' But I think maybe this sentence could be rephrased." – [Patient 7] | [in] Cerita buruk orang-orang terkait minum obat kronis membuat saya tidak rutin minum obat  [en] Negative stories from other people about taking chronic medication make me not take my medicine regularly |
| SC7 | [in] Saya melewatkan minum obat karena tidak punya uang untuk berobat  [en] I miss my medication because I cannot afford to pay for the related healthcare costs | "I understand that financial issues can sometimes be a barrier, due to BPJS policies. I think this sentence is clear and easy to understand." – [Patient 10] | No modification |
| SC8 | [in] Saya melewatkan minum obat karena harganya terlalu mahal  [en] I missed taking my medication because the price was too expensive | "The sentence is quite clear and easy to understand." - [Patient 3] | No modification |

Details on item number and factor category:

| **Factor** | **Item Number(s) in Scale** | **ID** | **Theme** |
| --- | --- | --- | --- |
| **Patient-related** | 1, 2 | PX1, PX2 | Being busy |
| 3, 4, 5 | PX3, PX4, PX5 | Forgetfullness |
| 6, 7 | PX6, PX7 | Travelling |
| 8, 9, 10, 11, 12, 13 | PX8, PX9, PX10, PX11, PX12, PX13 | Lack of knowledge |
| 14, 15, 16, 17 | PX14, PX15, PX16, PX17 | High concern of experience adverse effect |
| **Disease-related** | 18, 19 | MD1, MD2 | Polypharmacy |
| 20,21 | MD3, MD4 | The use of traditional medicine |
| **Healthcare and system-related** | 22, 23, 24 | HP1, HP2, HP3 | Provider Service Dissatisfaction |
| 25, 26, 27 | HP4, HP5, HP6 | Access and comfort of healthcare sytem |
| **Socioeconomic-related** | 28, 29 | SC1, SC2 | Lack of support |
| 30,31 | SC3, SC4 | Religious belief |
| 32, 33 | SC5, SC6 | Social rumors |
| 34, 35 | SC7, SC8 | Financial constraint |

**Appendix 9. Final Scale**

**English Version**

| No | Item Code | | Item Questions | 0 | 1 | 2 | 3 | 4 |
| --- | --- | --- | --- | --- | --- | --- | --- | --- |
| Patient Related Factors | | | | | | | | |
|  | PX1 | I skip my medication because I'm too busy | |  |  |  |  |  |
| 2. | PX3 | I often forget to take my medication | |  |  |  |  |  |
| 3. | PX7 | I skip my medication when I travel | |  |  |  |  |  |
| 4. | PX8 | I take less medication than prescribed | |  |  |  |  |  |
| 5. | PX9 | I only take my medication when I feel symptoms | |  |  |  |  |  |
| 6. | PX14 | I skip my medication because I'm worried about the side effects | |  |  |  |  |  |
| Medication Related Factors | | | | | | | | |
| 7. | MD1 | I find it difficult to keep track of all my medications because I take so many different medications | |  |  |  |  |  |
| 8. | MD4 | Taking traditional medicine makes me skip medication | |  |  |  |  |  |
| Healthcare Related Factors | | | | | | | | |
| 9. | HP1 | Dissatisfaction with healthcare provider service makes me take my medication irregularly | |  |  |  |  |  |
| 10. | HP3 | I skipped taking my medication because the instructions from the healthcare professional were confusing to me | |  |  |  |  |  |
| 11. | HP5 | Poor access to healthcare facilities affects my medication adherence. | |  |  |  |  |  |
| Socioeconomic-Related Factors | | | | | | | | |
| 12. | SC2 | Lack of family support makes it difficult for me to take medication regularly | |  |  |  |  |  |
| 13. | SC4 | I skipped taking my medication because I believe ultimately, it is God's will for us to die. | |  |  |  |  |  |
| 14. | SC6 | Negative stories from other people about taking chronic medication make me not take my medicine regularly | |  |  |  |  |  |
| 15. | SC7 | I miss my medication because I cannot afford to pay for the related healthcare costs | |  |  |  |  |  |

0 = never

1 = rarely

2 = sometimes

3 = often

4 = always

**Indonesian Version**

| No | Item Code | | Item Questions | 0 | 1 | 2 | 3 | 4 |
| --- | --- | --- | --- | --- | --- | --- | --- | --- |
| Faktor Terkait Pasien | | | | | | | | |
|  | PX1 | Saya melewatkan minum obat karena aktivitas saya yang terlalu sibuk | |  |  |  |  |  |
| 2. | PX3 | Saya sering lupa meminum obat saya | |  |  |  |  |  |
| 3. | PX7 | Saya melewatkan minum obat saat berpergian | |  |  |  |  |  |
| 4. | PX8 | Saya meminum obat lebih sedikit dari yang diresepkan | |  |  |  |  |  |
| 5. | PX9 | Saya minum obat hanya ketika merasakan keluhan saja | |  |  |  |  |  |
| 6. | PX14 | Saya melewatkan minum obat karena khawatir efek sampingnya. | |  |  |  |  |  |
| Faktor Terkait Pengobatan | | | | | | | | |
| 7. | MD1 | Saya sulit minum obat teratur karena banyak jenis obat yang saya minum | |  |  |  |  |  |
| 8. | MD4 | Penggunaan obat tradisional membuat saya tidak rutin meminum obat dari dokter | |  |  |  |  |  |
| Faktor Terkait Fasilitas Pelayanan Kesehatan | | | | | | | | |
| 9. | HP1 | Ketidakpuasan dengan pelayanan tenaga kesehatan membuat saya tidak rutin minum obat | |  |  |  |  |  |
| 10. | HP3 | Saya melewatkan minum obat karena petunjuk minum obat dari tenaga kesehatan membingungkan bagi saya | |  |  |  |  |  |
| 11. | HP5 | Akses yang buruk ke fasilitas kesehatan mempengaruhi kepatuhan saya dalam minum obat | |  |  |  |  |  |
| Faktor Terkait Sosiokenomi | | | | | | | | |
| 12. | SC2 | Kurangnya dukungan keluarga membuat saya sulit rutin minum obat | |  |  |  |  |  |
| 13. | SC4 | Saya melewatkan minum obat karena pada akhirnya takdir Tuhan akan membuat kita meninggal juga | |  |  |  |  |  |
| 14. | SC6 | Cerita buruk orang-orang terkait minum obat kronis membuat saya tidak rutin minum obat | |  |  |  |  |  |
| 15. | SC7 | Saya melewatkan minum obat karena tidak punya uang untuk berobat | |  |  |  |  |  |

0 = Tidak Pernah

1 = Jarang

2 = Kadang

3 = Sering

4 = Selalu

**Appendix 10. Receiver Operating Characteristic (ROC) Analysis**

**Table Appendix 8.1. Youden’s Index (J)**

| **Positive if Less Than or Equal Toa** | **Sensitivity** | **Specificity** |
| --- | --- | --- |
| -1,00 | 0,000 | 1,000 |
| 1,00 | 0,010 | 1,000 |
| 2,50 | 0,014 | 1,000 |
| 3,50 | 0,017 | 1,000 |
| 4,50 | 0,028 | 1,000 |
| 5,50 | 0,031 | 1,000 |
| 6,50 | 0,035 | 1,000 |
| 7,50 | 0,042 | 1,000 |
| 8,50 | 0,056 | 1,000 |
| 9,50 | 0,063 | 1,000 |
| 10,50 | 0,070 | 0,992 |
| 11,50 | 0,087 | 0,992 |
| 12,50 | 0,717 | 0,925 |
| 13,50 | 0,839 | 0,910 |
| 14,50 | 0,962 | 0,714 |
| 15,50 | 0,979 | 0,571 |
| 16,50 | 0,993 | 0,406 |
| 17,50 | 0,993 | 0,263 |
| 18,50 | 0,993 | 0,188 |
| 19,50 | 0,993 | 0,150 |
| 20,50 | 0,993 | 0,143 |
| 21,50 | 0,997 | 0,113 |
| 22,50 | 1,000 | 0,098 |
| 24,00 | 1,000 | 0,083 |
| 25,50 | 1,000 | 0,075 |
| 26,50 | 1,000 | 0,060 |
| 27,50 | 1,000 | 0,053 |
| 29,00 | 1,000 | 0,038 |
| 31,00 | 1,000 | 0,023 |
| 34,00 | 1,000 | 0,015 |
| 37,00 | 1,000 | 0,000 |

**Note**

Note

|  | Cut-off |
| --- | --- |

**
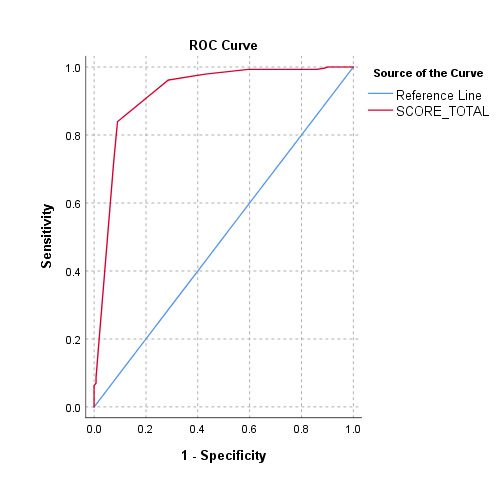
**

Figure Appendix 8. ROC Curve Analysis
